# Supplementary material for: A microrna screen to identify regulators of peritoneal fibrosis in a rat model of peritoneal dialysis
Source: PubMed Central journal article supplement (PMC4546227; doi:10.1186/s12882-015-0039-z), 2015-04-09
Supplement: 12882_2015_39_MOESM1_ESM.pdf [file 12882_2015_39_MOESM1_ESM.pdf]

**Online Resource 1.** Sequences of primers used in real-time PCR analysis of mRNA expression

---

| Gene   | Sequences (5' to 3') |
|--------|----------------------|
| GAPDH  | GCAAGTTC AACGGCACAG  |
|        | GCCAGTAGACTCCACGACAT |
| α -SMA | CTTCTATAACGAGCTTCGC  |
|        | TCCAGAGTCCAGCACAAAT  |
| COL-1  | ACTCAGCCCTCTGTGCCT   |
|        | CCTTCGCTTCCATACTCG   |

---
