# Supplementary material for: A microrna screen to identify regulators of peritoneal fibrosis in a rat model of peritoneal dialysis
Source: PubMed Central journal article supplement (PMC4546227; doi:10.1186/s12882-015-0039-z), 2015-04-09
Supplement: 12882_2015_39_MOESM2_ESM.pdf [file 12882_2015_39_MOESM2_ESM.pdf]

**Online Resource 2.** Sequences of primers used in real-time PCR analysis of miRNA

| miRNA   | Sequences                                                                                                                                               |
|---------|---------------------------------------------------------------------------------------------------------------------------------------------------------|
| miR-31  | RT-primer <sup>a</sup> : GTCGTATCCAGTGCAGGGTCCGAGGTA<br>TTCGCACTGGATACGACCAGCTATG<br>F-primer: ATGGTTGGGAGGCAAGATGCTGG<br>R-primer: GGTCCGAGGTATTCGCACT |
| miR-93  | RT-primer: GTCGTATCCAGTGCAGGGTCCGAGG<br>TATTCGCACTGGATACGACCTACCTGC<br>F-primer: ATGGTTGGGCAAAGTGCTGTTCGT<br>R-primer: CGTATCCAGTGCAGGGTCCG             |
| miR-100 | RT-primer: GTCGTATCCAGTGCAGGGTCCGAGGT<br>ATTCGCACTGGATACGACCACAAGTT<br>F-primer: ATGGTTGGGAACCCGTAGATCCGAA<br>R-primer: CGTATCCAGTGCAGGGTCCG            |
| miR-152 | RT-primer: GTCGTATCCAGTGCAGGGTCCGAGGT<br>ATTCGCACTGGATACGACCCAAGTTC<br>F-primer: ATGGTTGGGTCAGTGCATGACAGA<br>R-primer: TATCCAGTGCAGGGTCCGA              |
| miR-497 | RT-primer: GTCGTATCCAGTGCAGGGTCCGAGGT<br>ATTCGCACTGGATACGACTACAAACC                                                                                     |

F-primer: ATGGTTGGGCAGCAGCACACTGT

R-primer: GGTCCGAGGTATTCGCACT

---

miR-192

RT-primer: GTCGTATCCAGTGCAGGGTCCGAGGTA

TTCGCACTGGATACGACGGCTGTCA

F-primer: ATGGATCGTGGGCTGACCTATGAATTG

R-primer: GCAGGGTCCGAGGTATTC

---

miR-194

RT-primer: GTCGTATCCAGTGCAGGGTCCGAGGT

ATTCGCACTGGATACGACTCCACATG

F-primer: ATGGTTCGTGGGTGTAACAGCAACTCCA

R-primer: GCAGGGTCCGAGGTATTC

---

miR-200b

RT-primer: GTCGTATCCAGTGCAGGGTCCGAGGT

ATTCGCACTGGATACGACGTCATCAT

F-primer: TTGGTTCGTGGGTAATACTGCCTGGTA

R-primer: GCAGGGTCCGAGGTATTC

---

U6

RT-primer: CGCTTCACGAATTTGCGTGTCAT

F-primer: GCTTCGGCAGCACATATACTAAAAT

R-primer: CGCTTCACGAATTTGCGTGTCAT

---

<sup>a</sup> RT-primer: primer used in reverse transcription PCR
